# Supplementary material for: Monitoring the Site-Specific Solid-State NMR Data in Oligopeptides
Source: MDPI journal article supplement (doi:10.3390/ijms21082700), 2020-04-13
Supplement: s1 [file s1]

Supplementary Information to “Monitoring the site-specific solid-state NMR  
data of oligopeptides” by Czernek & Brus (*Int. J. Mol. Sci.* **2020**)

Table S1: The values (in ppm) of principal elements of the  $^{15}\text{N}_{\text{amid}}$  chemical shielding ( $\sigma$ ) / shift ( $\delta$ ) tensors as actually used.

| site        | the least shielded component |          | the mid shielded component |          | the most shielded component |          |
|-------------|------------------------------|----------|----------------------------|----------|-----------------------------|----------|
|             | $\sigma$                     | $\delta$ | $\sigma$                   | $\delta$ | $\sigma$                    | $\delta$ |
| G G* G      | 1.3897                       | 209.2667 | 152.2426                   | 67.4667  | 187.4243                    | 32.8667  |
| V G* G      | -16.4992                     | 219.5333 | 148.5507                   | 78.2333  | 176.0899                    | 43.3333  |
| P G* G      | -3.7239                      | 209.2000 | 163.5715                   | 59.1000  | 169.0626                    | 51.8000  |
| A G* G      | -1.1447                      | 210.1000 | 165.1714                   | 55.8000  | 169.8787                    | 48.5000  |
| F G* G      | -18.9621                     | 223.4000 | 152.3791                   | 71.1000  | 166.8488                    | 53.2000  |
| G G* V      | -8.5323                      | 219.8000 | 160.2319                   | 62.8000  | 169.2221                    | 55.8000  |
| N-Ac-Aib-OH | -39.6744                     | 244.0    | 116.5271                   | 144.0    | 144.9013                    | 68.0     |
| N-Ac-Leu-OH | -28.5929                     | 233.5    | 132.7600                   | 94.5     | 157.4859                    | 55.0     |
| A P* G      | -14.9525                     | 231.0    | 82.2485                    | 127.0    | 187.5769                    | 38.0     |

Table S2: The values (in ppm) of principal elements of the  $^{13}\text{C}_{\alpha}$  chemical shielding ( $\sigma$ ) / shift ( $\delta$ ) tensors as actually used.

| site   | the least shielded component |          | the mid shielded component |          | the most shielded component |          |
|--------|------------------------------|----------|----------------------------|----------|-----------------------------|----------|
|        | $\sigma$                     | $\delta$ | $\sigma$                   | $\delta$ | $\sigma$                    | $\delta$ |
| G G* G | 109.7816                     | 58.1000  | 123.7610                   | 48.9000  | 151.4309                    | 22.9000  |
| V G* G | 109.2250                     | 57.8000  | 126.7013                   | 48.1000  | 151.3295                    | 23.1000  |
| P G* G | 98.0611                      | 69.4667  | 131.2338                   | 40.7667  | 155.4482                    | 18.7667  |
| A G* G | 97.6568                      | 69.9333  | 130.6169                   | 41.8333  | 159.2736                    | 16.9333  |
| F G* G | 97.9261                      | 69.6333  | 129.2557                   | 43.3333  | 153.9203                    | 20.5333  |
| G G* V | 97.3389                      | 70.6333  | 129.8342                   | 42.0333  | 152.7927                    | 21.7333  |

Figure S1: The linear relationship between theoretical and experimental eigenvalues of the  $^{15}\text{N}_{\text{amid}}$  chemical shielding/shift tensors of the central glycines in GGG, VGG, PGG, AGG, FGG and GGV tripeptides described in the main text;  $\sigma = -1.0876 \cdot \delta + 226.50$  ppm (18 data points); standard deviation 3.2 ppm, adjusted  $R^2 = 0.99846$ .

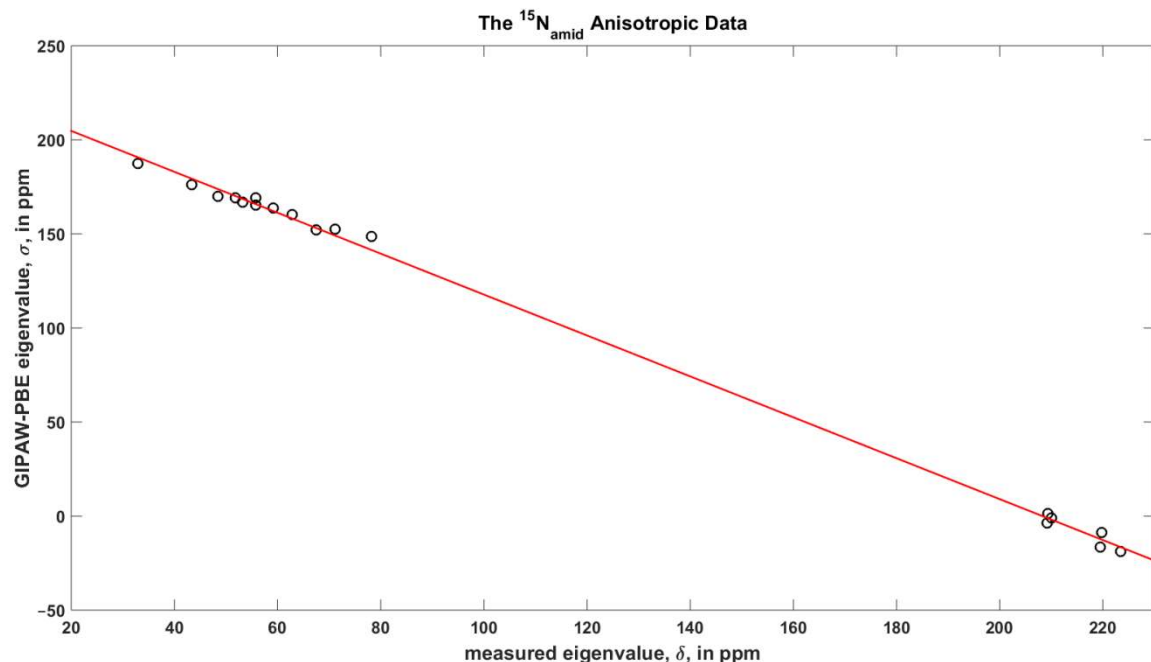

Figure S2: The linear relationship between theoretical and experimental eigenvalues of the  $^{13}\text{C}_{\alpha}$  chemical shielding/shift tensors of the central glycines in GGG, VGG, PGG, AGG, FGG and GGV tripeptides described in the main text;  $\sigma = -1.1475 \cdot \delta + 178.10$  ppm (18 data points); standard deviation 1.4 ppm, adjusted  $R^2 = 0.99619$ .

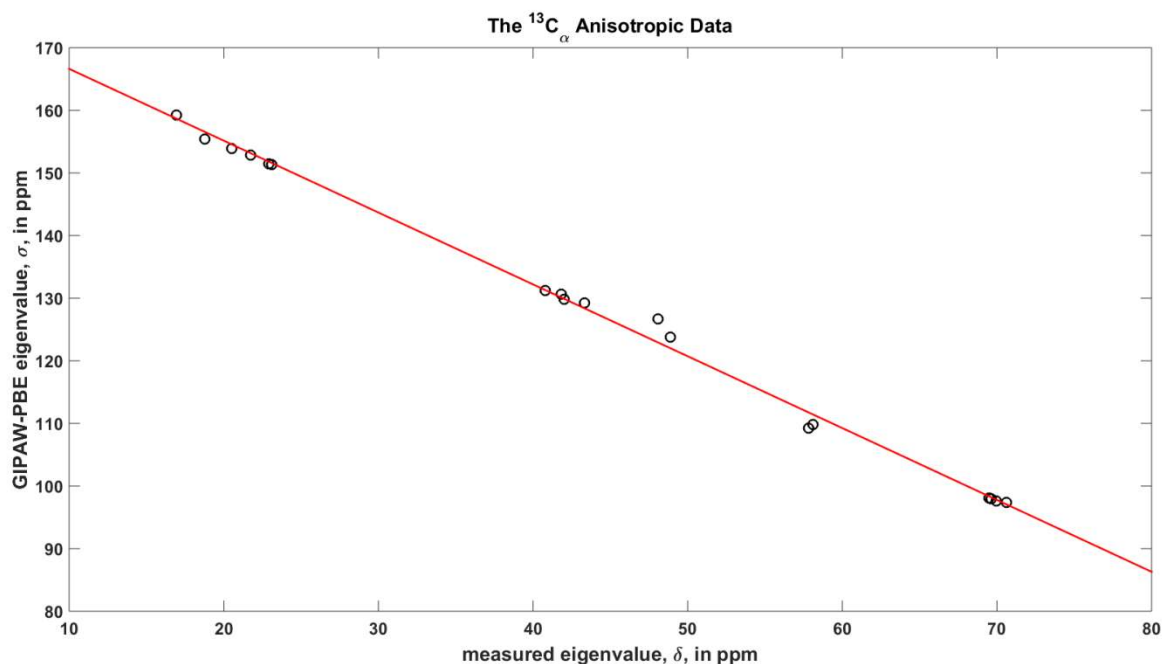

Table S3: Atom numbers in the optimized structure (named ‘Samara1final.pdb’ and available in Supplementary Materials) of samarosporin I used to extract distances and angles which are described in the main text.

| site  | atom #            |                   |                |
|-------|-------------------|-------------------|----------------|
|       | N <sub>amid</sub> | H <sub>amid</sub> | C <sub>α</sub> |
| Phe1  | 7                 | 18                | 8              |
| Aib2  | 27                | 33                | 28             |
| Aib3  | 40                | 46                | 41             |
| Aib4  | 53                | 59                | 54             |
| Val5  | 66                | 73                | 67             |
| Gly6  | 82                | 86                | 83             |
| Leu7  | 89                | 97                | 90             |
| Aib8  | 108               | 114               | 109            |
| Aib9  | 121               | 127               | 122            |
| Gln11 | 149               | 158               | 150            |
| Iva12 | 166               | 173               | 167            |
| Aib14 | 197               | 203               | 198            |
| Fol15 | 210               | 221               | 211            |
